# Supplementary material for: Core–shell Co@SiO2nanosphere immobilized Ag nanoparticles for hydrogen evolution from ammonia borane
Source: Royal Society of Chemistry journal article supplement (doi:10.1039/c6ra19126f), 2016-01-01
Supplement: c6ra19126f1.pdf [file c6ra19126f1.pdf]

## Supporting information

### **Core-shell Co@SiO<sub>2</sub> nanospheres immobilized Ag nanoparticles for hydrogen evolution from ammonia borane**

Qilu Yao, Zhang-Hui Lu,\* Yajuan Hu, Xiangshu Chen\*

*Jiangxi Inorganic Membrane Materials Engineering Research Centre, College of Chemistry and Chemical Engineering, Jiangxi Normal University, Nanchang, 330022, P. R. China*

\*E-mail: luzh@jxnu.edu.cn, cxs66cn@jxnu.edu.cn

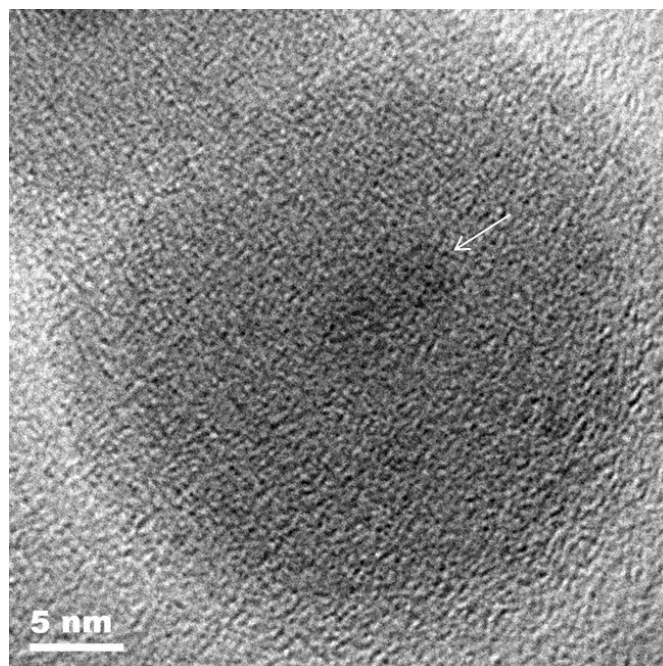

**Fig. S1** TEM image of Co@SiO<sub>2</sub> nanospheres.

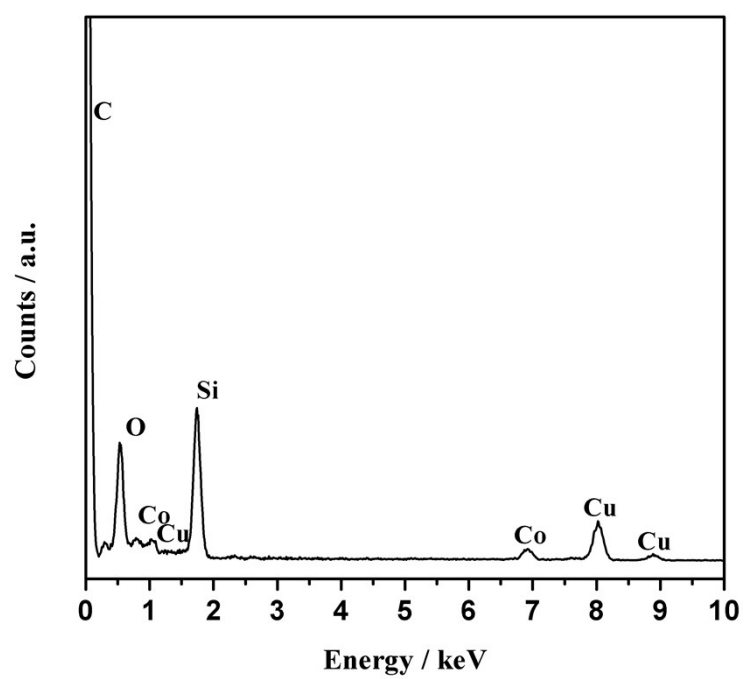

**Fig. S2** The corresponding EDX spectrum for the Co@SiO<sub>2</sub> NPs.

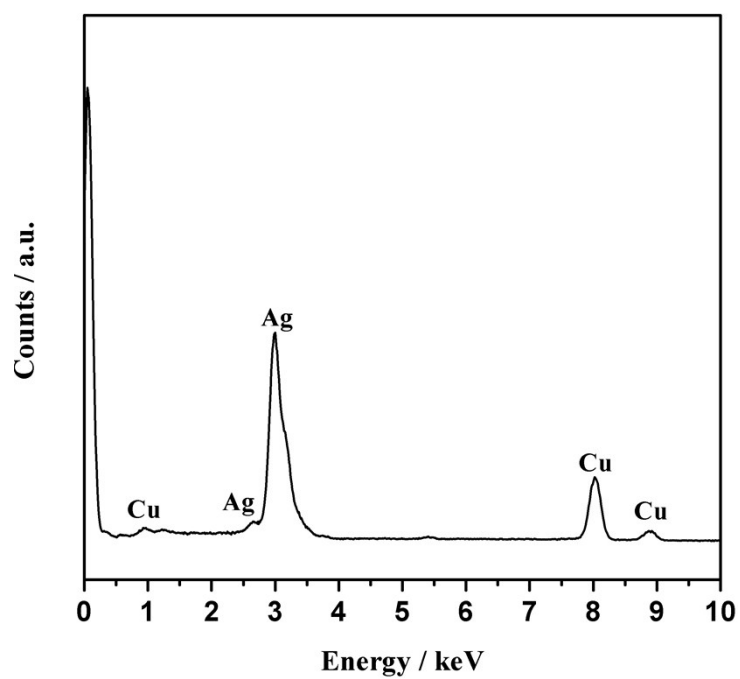

**Fig. S3** The corresponding EDX spectrum for the Ag NPs.

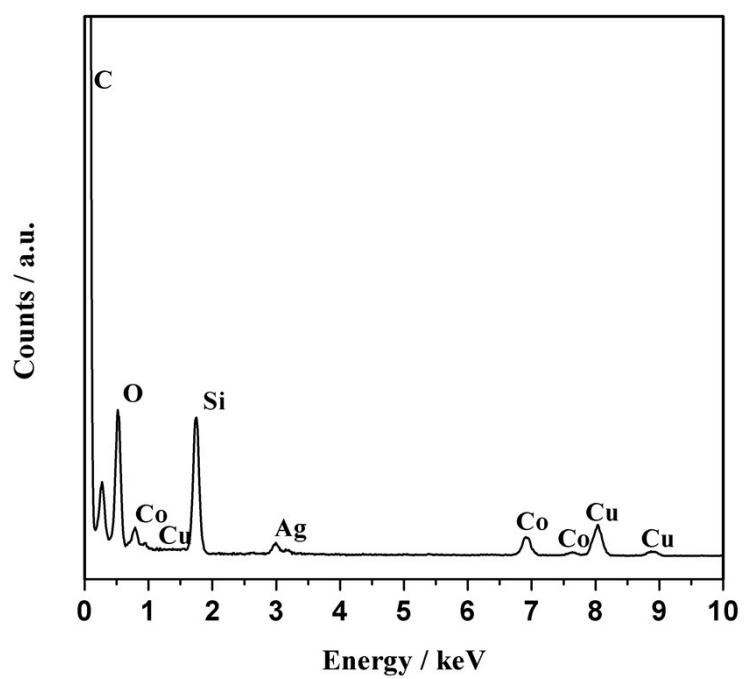

**Fig. S4** The corresponding EDX spectrum for the Co@SiO<sub>2</sub>/Ag NCs.

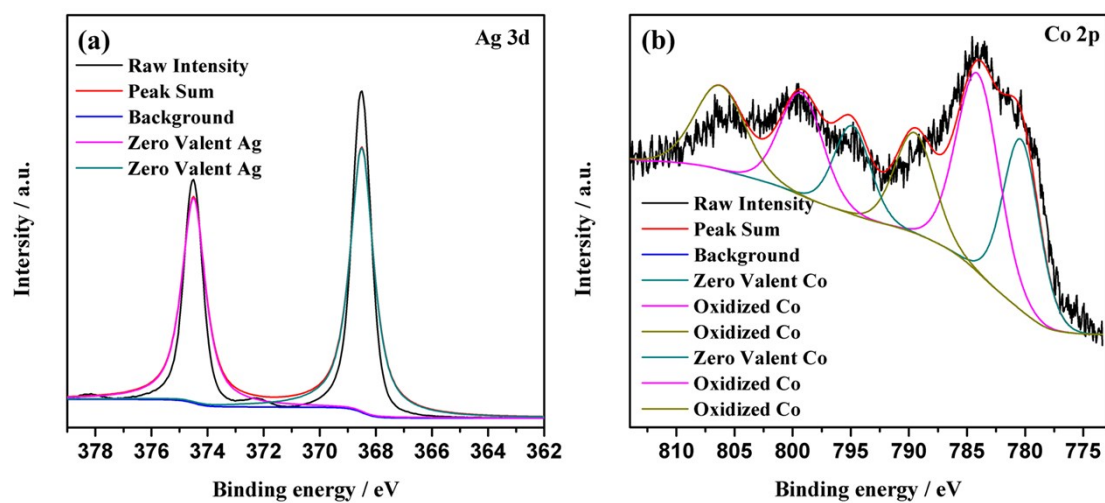

**Fig. S5** XPS spectra of (a) Ag 3d for the free Ag and (b) Co 2p for the Co@SiO<sub>2</sub>.

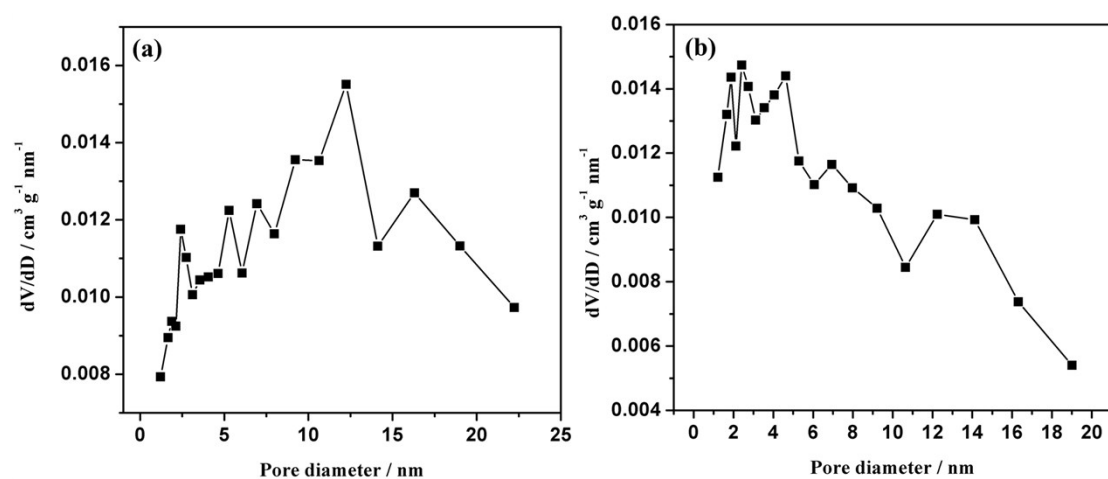

**Fig. S6** The pore size distribution of (a) Co@SiO<sub>2</sub> and (b) Co@SiO<sub>2</sub>/Ag nanospheres.

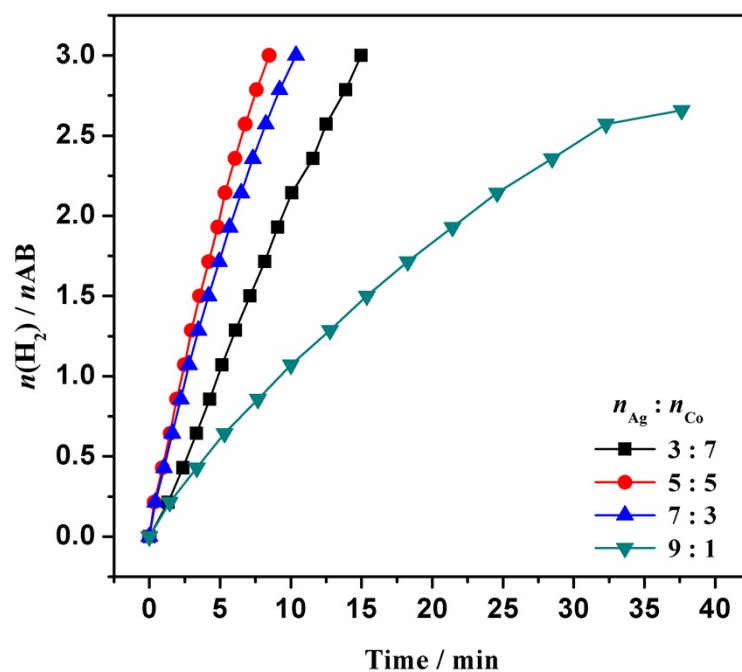

**Fig. S7** Hydrogen generation from the hydrolysis of AB (0.2 M, 5 mL) catalyzed by Co@SiO<sub>2</sub>/Ag NCs with different Ag and Co molar contents at 298 K (metal/AB = 0.02).

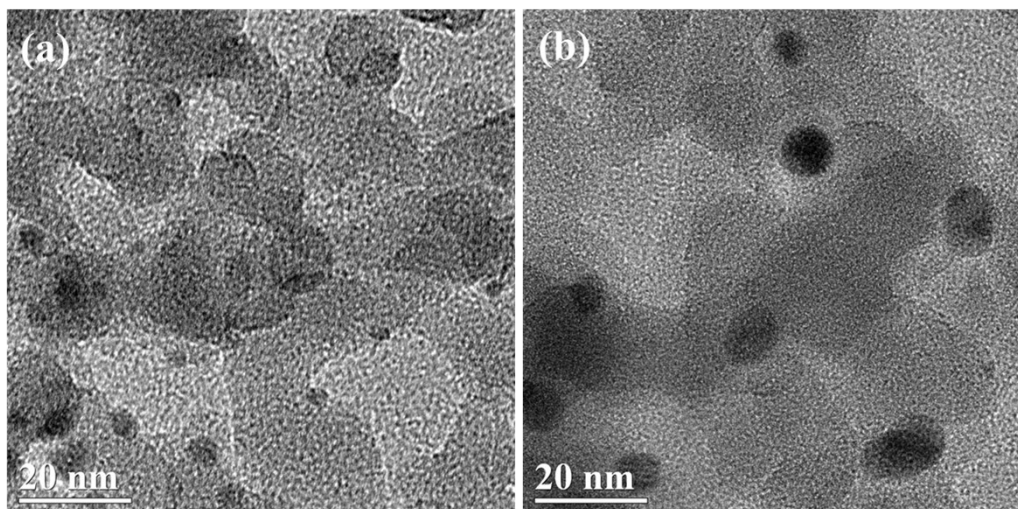

**Fig. S8** TEM images of the (a) Ag/SiO<sub>2</sub>-24 h NCs and (b) Ag/SiO<sub>2</sub>-12 h NCs.

The commercial SiO<sub>2</sub> supported Ag NPs were prepared via in situ synthesis method. Briefly, 3.41 mg AgNO<sub>3</sub> and 50 mg commercial SiO<sub>2</sub> (Degussa, 200 m<sup>2</sup> g<sup>-1</sup>) were dissolved in 5 mL of distilled water. After the mixtures were vigorously stirred at room temperature for 12 h (labeled as Ag/SiO<sub>2</sub>-12 h) or 24 h (labeled as Ag/SiO<sub>2</sub>-24 h), 34.3 mg of AB ( $n_{\text{Ag}}/n_{\text{AB}} = 0.02$ ) was added into the solution with stirring. The size and morphology of the above two samples were characterized by TEM. As shown in Fig. S8, the size of Ag NPs in Ag/SiO<sub>2</sub>-24 h is much smaller than that of Ag/SiO<sub>2</sub>-12 h. The catalytic activities of Ag catalysts for the hydrolysis of AB were increased with the decreasing size of Ag NPs (Fig. S9). The catalytic activities are in the order of Ag/SiO<sub>2</sub>-24 h > Ag/SiO<sub>2</sub>-12 h > free Ag (Fig. S9). Yet, the hydrolysis of AB was still not complete by the monometallic Ag catalyst with smaller Ag NPs size (Ag/SiO<sub>2</sub>-24 h).

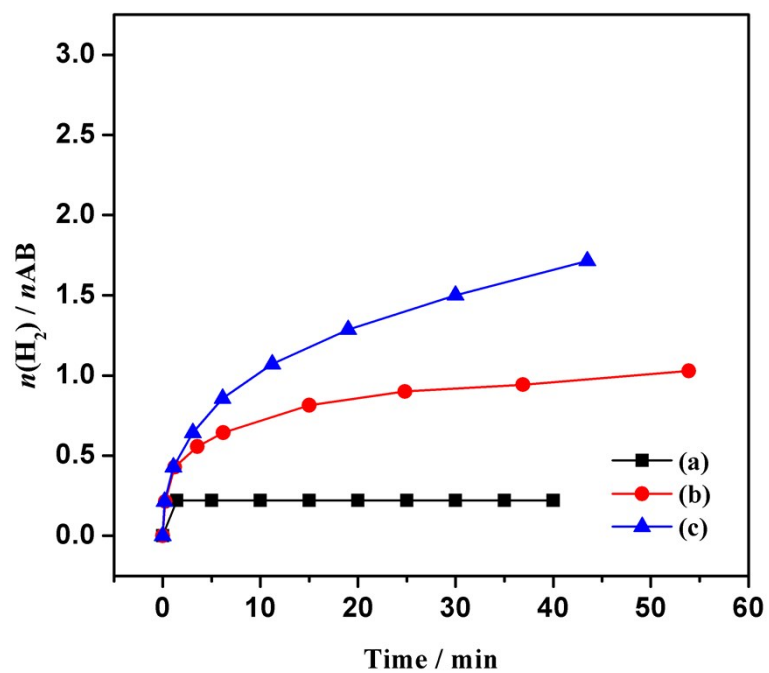

**Fig. S9** Hydrogen generation from the hydrolysis of AB (0.2 M, 5 mL) catalyzed by (a) free Ag, (b) Ag/SiO<sub>2</sub>-12 h, and (c) Ag/SiO<sub>2</sub>-24 h at 298 K (metal/AB = 0.02).

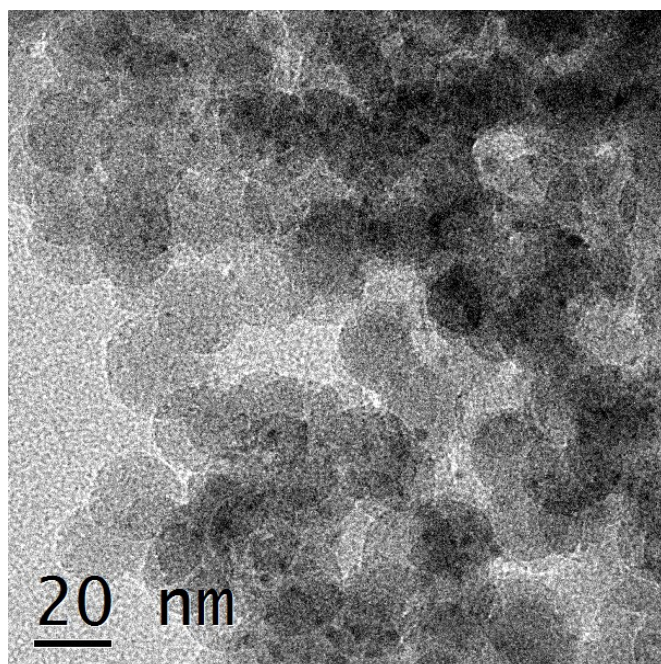

**Fig. S10** TEM image of the recycled Co@SiO<sub>2</sub>/Ag NCs.
